# Supplementary material for: Use of the XRCC2 promoter for in vivo cancer diagnosis and therapy
Source: PubMed Central journal article supplement (PMC5856804; doi:10.1038/s41419-018-0453-9), 2018-03-16
Supplement: 41419_2018_453_MOESM2_ESM.pdf [file 41419_2018_453_MOESM2_ESM.pdf]

**a**

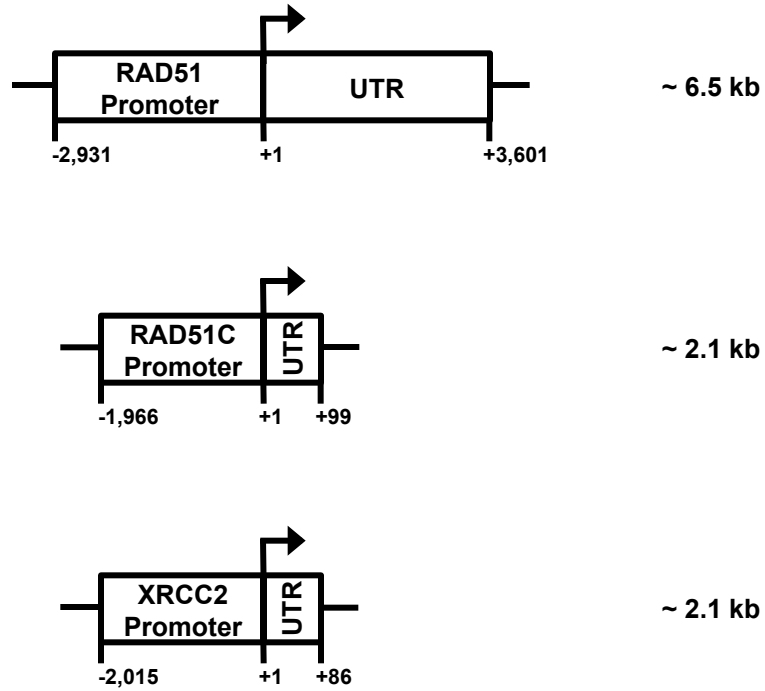

**b**

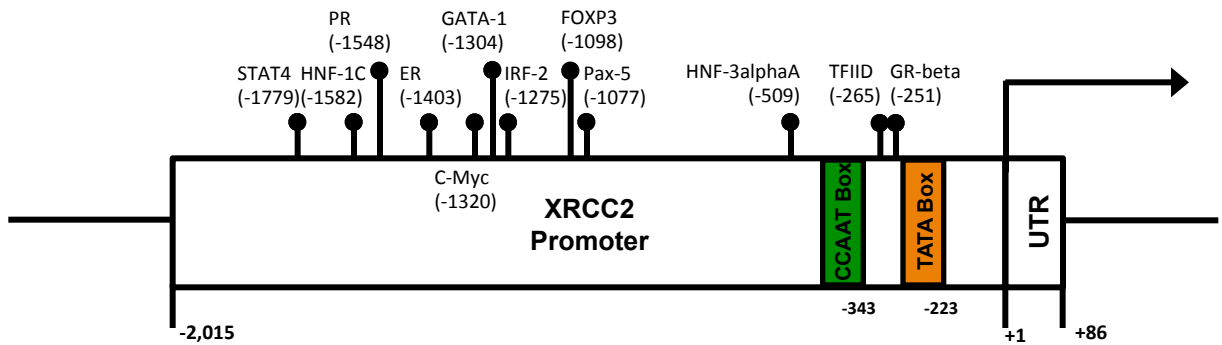

**a**

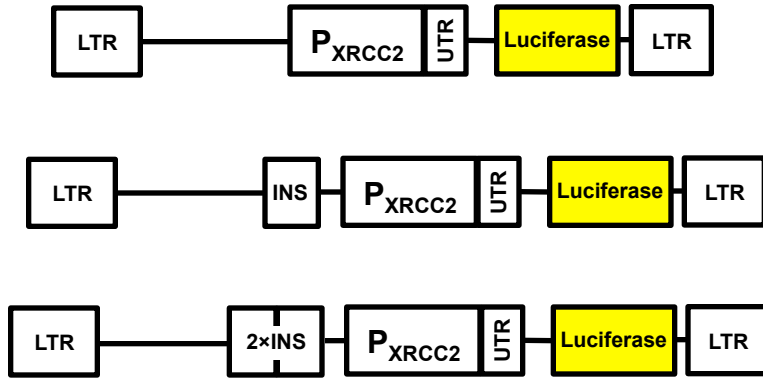

**b**

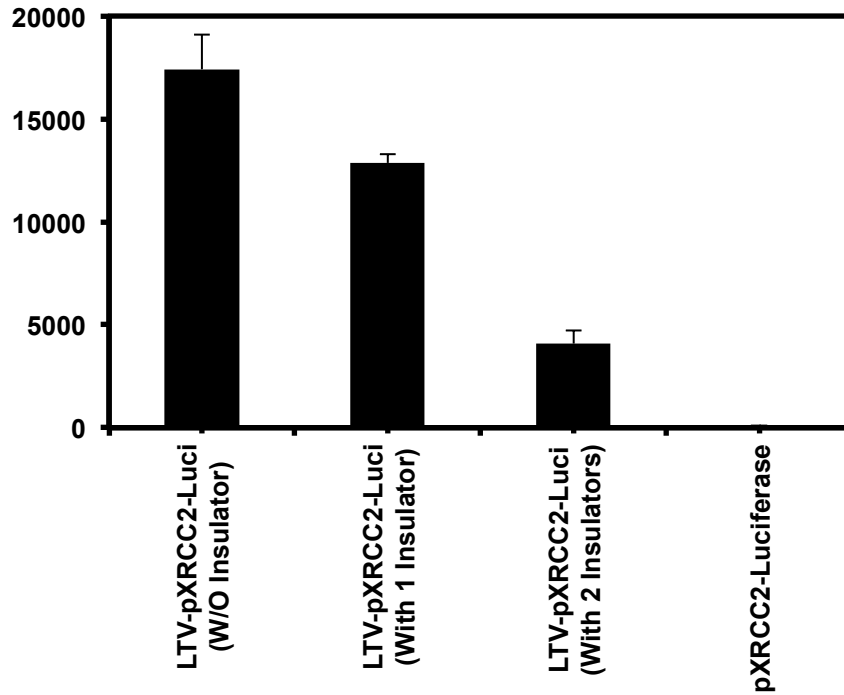

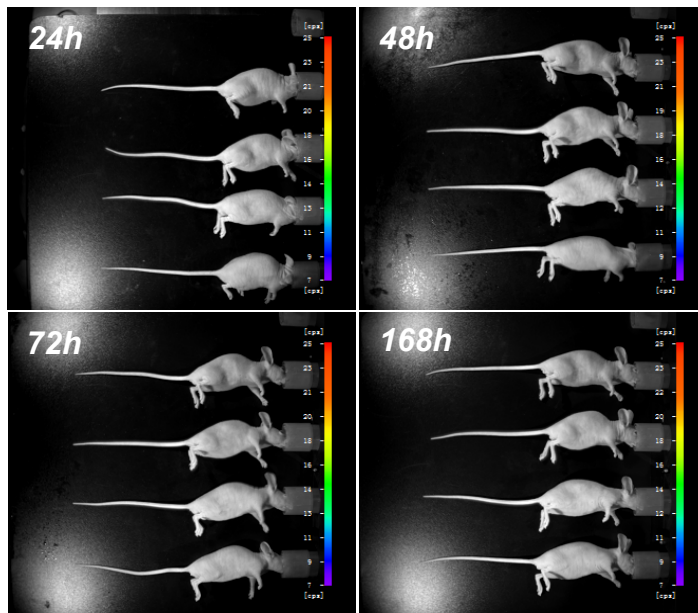

Controls without pXRCC2-Luc Virus

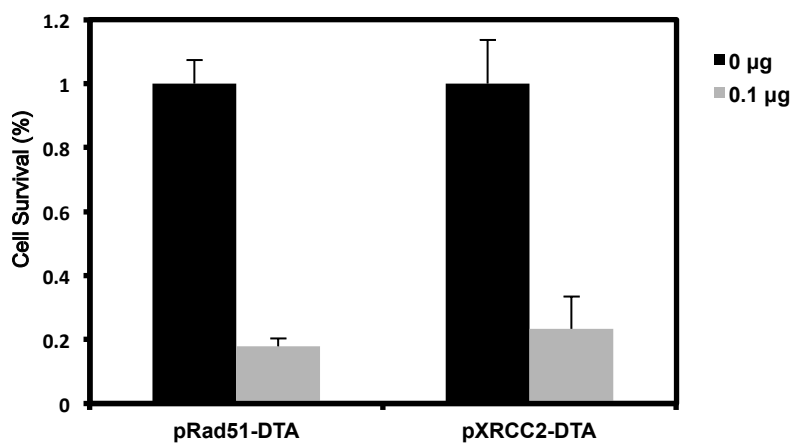

Supplementary Figure 4
